# Supplementary material for: Association between physicians’ interaction with pharmaceutical companies and their clinical practices: A systematic review and meta-analysis
Source: PubMed Central journal article supplement (PMC5391068; doi:10.1371/journal.pone.0175493), 2017-04-13
Supplement: pone.0175493.s003.pdf [file pone.0175493.s003.pdf]

## **S2 Appendix: full search strategy**

Database: Ovid MEDLINE(R) <1946 to July Week 3 2016>

Search Strategy:

---

- 1 Conflict of Interest.mp. or "Conflict of Interest"/ (9575)
- 2 Drug Industry/ (30180)
- 3 Gift Giving/ (1385)
- 4 detailman.mp. (4)
- 5 commercial information.mp. (33)
- 6 ((drug or pharma\*) adj3 (industry or firm\* or manufacture\* or compan\*)).mp. (41596)
- 7 physician\*.mp. (443378)
- 8 doctor\*.mp. (93268)
- 9 Physicians/ (76762)
- 10 primary care.mp. (77107)
- 11 or/1-6 (49715)
- 12 or/7-10 (545360)
- 13 11 and 12 (5810)
- 14 13 not (comment or editorial or letter).pt. (4869)

\*\*\*\*\*

Database: Embase <1980 to 2016 Week 31>

Search Strategy:

---

- 1 Conflict of Interest.mp. or "Conflict of Interest"/ (10662)
- 2 Drug Industry/ (71418)
- 3 Gift Giving/ (1003)

- 4 detailman.mp. (3)
- 5 commercial information.mp. (50)
- 6 ((drug or pharma\*) adj3 (industry or firm\* or manufacture\* or compan\*)).mp.  
(102994)
- 7 physician\*.mp. (556336)
- 8 doctor\*.mp. (211287)
- 9 Physician/ (228048)
- 10 primary care.mp. (111197)
- 11 or/1-6 (112316)
- 12 or/7-10 (755418)
- 13 11 and 12 (8715)
- 14 13 not (comment or editorial or letter).pt. (7531)

\*\*\*\*\*
