# Supplementary material for: Association between physicians’ interaction with pharmaceutical companies and their clinical practices: A systematic review and meta-analysis
Source: PubMed Central journal article supplement (PMC5391068; doi:10.1371/journal.pone.0175493), 2017-04-13
Supplement: pone.0175493.s004.pdf [file pone.0175493.s004.pdf]

**S1 Table:** Summary of contacting authors of included studies for additional information or data

| <b>Study Name</b> | <b>Information requested</b>                                                                                                                                           | <b>Response</b>                                                                                     |
|-------------------|------------------------------------------------------------------------------------------------------------------------------------------------------------------------|-----------------------------------------------------------------------------------------------------|
| Becker, 1972 [1]  | Odds ratio or raw data to calculate odds ratio for the association between use of detail men as sources of prescribing information and prescription of chloramphenicol | Two reminders were sent but author didn't reply back                                                |
| Peah 1988 [2]     | Odds ratio or raw data to calculate odds ratio for the association between detailmen and prescription patter, and sample size and prescription pattern                 | We couldn't find the emails of any of the authors even after a detailed search                      |
| Orlowski 2002 [3] | Whether values reported are for standard deviation or standard error                                                                                                   | Author confirmed that standard deviation was used in the analysis                                   |
| Caamano 2002 [4]  | Odds ratio for the association between sales visit and prescription amount                                                                                             | Author reported he was not able to find requested data                                              |
| Mizik 2005[5]     | Data to calculate the Odds ratio for association between sampling and new prescription, and detailing and new prescription, for drugs A, B, C respectively             | Author is unable to share data because she does not have the permission of the data owner to do so. |
| Muijres, 2005 [6] | Data to calculate means and SD                                                                                                                                         | Author stated that he has retired since 2008                                                        |
| Symm , 2006 [7]   | sample medication were dispensed) significantly wrote the largest proportion of prescriptions for study medications                                                    | Author reported that he can't provide the data                                                      |
| Pedan 2011[8]     | Whether values reported are for standard deviation or standard error                                                                                                   | Author clarified that standard errors were used in the analysis                                     |
| Hurley, 2014 [9]  | N values to calculate the mean and SD for office-based dermatologists on a national level where free samples are available.                                            | Author did not reply back                                                                           |

References

1. Becker MH, Stolley PD, Lasagna L, McEvilla JD, Sloane LM: **Correlates of physicians' prescribing behavior.** *Inquiry* 1972, **9**(3):30-42.
2. Peay MY, Peay ER: **The role of commercial sources in the adoption of a new drug.** *Social science & medicine* 1988, **26**(12):1183-1189.
3. Orłowski JP, Wateska L: **The effects of pharmaceutical firm enticements on physician prescribing patterns. There's no such thing as a free lunch.** *Chest* 1992, **102**(1):270-273.
4. Caamano F, Figueiras A, Gestal-Otero JJ: **Influence of commercial information on prescription quantity in primary care.** *Eur J Public Health* 2002, **12**(3):187-191.
5. Mizik N JR: **Are Physicians "Easy Marks"? Quantifying the Effects of Detailing and Sampling on New Prescriptions.** *Management Science* 2004, **50**(12):1704-1715.
6. Muijrsers PE, Grol RP, Sijbrandij J, Janknegt R, Knottnerus JA: **Differences in prescribing between GPs: impact of the cooperation with pharmacists and impact of visits from pharmaceutical industry representatives.** *Fam Pract* 2005, **22**(6):624-630.
7. Symm B AM, Forjuob SN, Preece: **Effects of using free sample medications on the prescribing practices of family physicians.** *J Am Board Fam Med* 2006, **19**:443-449.
8. Pedan A, Wu H: **Asymmetric responsiveness of physician prescription behavior to drug promotion of competitive brands within an established therapeutic drug class.** *Health Mark Q* 2011, **28**(2):133-154.
9. Hurley MP, Stafford RS, Lane AT: **Characterizing the relationship between free drug samples and prescription patterns for acne vulgaris and rosacea.** *JAMA dermatology* 2014, **150**(5):487-493.
