# Supplementary material for: Association between physicians’ interaction with pharmaceutical companies and their clinical practices: A systematic review and meta-analysis
Source: PubMed Central journal article supplement (PMC5391068; doi:10.1371/journal.pone.0175493), 2017-04-13
Supplement: pone.0175493.s005.pdf [file pone.0175493.s005.pdf]

**S2 Table:** List of excluded studies along with reasons for exclusion

Full-text articles excluded, with reasons (n=85)

- Qualitative study (n= 6)
- Ecological study (n= 7)
- Not a primary study (n= 11)
- No association of interest (n=6)
- No control group of interest (n= 8)
- No exposure of interest (n= 12)
- No outcome of interest (n= 8)
- Not industry related (n= 3)
- Measures attitude towards physician-industry interaction (n= 9)
- Focuses on medical student/residents/trainees (n= 4)
- Non-English study (n= 4)
- Econometric study (n=1)
- Intervention studies (n=6)

| <b>Study</b>                  | <b>Reason for Exclusion</b>                                                                                                                                                                                                                       |
|-------------------------------|---------------------------------------------------------------------------------------------------------------------------------------------------------------------------------------------------------------------------------------------------|
| Ahmadi 2015(1)                | Not a primary study                                                                                                                                                                                                                               |
| Al-Areefi 2013(2)             | No exposure of interest<br>(study examines whether relationship between perception of PRS by physician and their prescribing behaviors were associated)                                                                                           |
| Alsageer 2012(3)              | No outcome of interest<br>(study examined the extent of doctors' involvements in PCRs' activities and the factors associated with such engagement, without linking such interactions to changes in knowledge, attitude or behavior of physicians) |
| Andaleeb 1996(4)              | Measures attitude towards physician-industry interaction                                                                                                                                                                                          |
| Anderson 2015(5)              | Intervention study                                                                                                                                                                                                                                |
| Anonymous 2015(6)             | Intervention study                                                                                                                                                                                                                                |
| Babu 2012(7)                  | No exposure of interest                                                                                                                                                                                                                           |
| Backer 2000(8)                | Qualitative study                                                                                                                                                                                                                                 |
| Berings and Habraken, 1994(9) | Not industry related<br>(Industry-independent drug information interventions)                                                                                                                                                                     |
| Bogenmann 2015 (10)           | No exposure of interest (surrogate exposure)                                                                                                                                                                                                      |
| Boltri, 2002 (11)             | Intervention study                                                                                                                                                                                                                                |
| Burashnikova 2008(12)         | Measures attitude towards physician-industry interaction                                                                                                                                                                                          |

|                                |                                                                                                                                                                                                           |
|--------------------------------|-----------------------------------------------------------------------------------------------------------------------------------------------------------------------------------------------------------|
| Caudill<br>1996(13)            | No association of interest<br>(Study only measured the association between attitudes towards pharmaceutical representative and frequency of use of information provided by pharmaceutical representative) |
| Chew 2000(14)                  | Study focused on medical students                                                                                                                                                                         |
| Chimonas<br>2007(15)           | Qualitative study                                                                                                                                                                                         |
| Chressanthis 2014<br>(16)      | Ecological study<br>(study looked at the association between organizational characteristics and actual adoption and not at the level of physician)                                                        |
| Christensen<br>1979(17)        | No association of interest                                                                                                                                                                                |
| Darmon<br>2015(18)             | Non-English study                                                                                                                                                                                         |
| De Angelis(19)                 | Not a primary study                                                                                                                                                                                       |
| De Ferrari<br>2014(20)         | No outcome of interest<br>(study did not relate exposure to outcome)                                                                                                                                      |
| De la Cauvas<br>2002(21)       | No control group of interest                                                                                                                                                                              |
| Donohue<br>2004(22)            | Ecological study<br>(measure of exposure was ecological)                                                                                                                                                  |
| Doval 2015(23)                 | Measures attitude towards physician-industry interaction                                                                                                                                                  |
| Fleischman<br>2016(24)         | Ecological study                                                                                                                                                                                          |
| Ferguson<br>1999(25)           | No outcome of interest                                                                                                                                                                                    |
| Freeman<br>1993(26)            | No exposure of interest                                                                                                                                                                                   |
| Freemantle et al,<br>2000 (27) | Intervention study                                                                                                                                                                                        |
| Fretheim<br>2005(28)           | Ecological study                                                                                                                                                                                          |
| Gonul 2001(29)                 | No control group of interest                                                                                                                                                                              |
| Gönül 2010(30)                 | No control group of interest<br>(compared E-detailing to traditional detailing)                                                                                                                           |
| Gunnarsdottir<br>2005(31)      | No exposure of interest                                                                                                                                                                                   |
| Halperin,<br>2004(32)          | Measures attitude towards physician-industry interaction                                                                                                                                                  |
| Hansen<br>2010(33)             | Ecological study<br>(study unable to capture person-level variation in promotional spending)                                                                                                              |
| Hemminki<br>2004(34)           | No exposure of interest                                                                                                                                                                                   |
| Henry 2002(35)                 | No outcome of interest                                                                                                                                                                                    |
| Herrera<br>2004(36)            | Non-English study                                                                                                                                                                                         |
| Hartung<br>2010(37)            | Intervention study                                                                                                                                                                                        |

|                        |                                                                                                                                                                                                                                           |
|------------------------|-------------------------------------------------------------------------------------------------------------------------------------------------------------------------------------------------------------------------------------------|
| Hossain 2013(38)       | No association of interest                                                                                                                                                                                                                |
| Ichikawa 2016(39)      | Not a primary study (commentary)                                                                                                                                                                                                          |
| Iizuka 2007(40)        | No exposure of interest                                                                                                                                                                                                                   |
| Indhumathi 2015(41)    | No outcome of interest                                                                                                                                                                                                                    |
| Joyce 2011(42)         | No outcome of interest (study focused more on whether broad or narrow prescribing is associated with patient-level outcomes)                                                                                                              |
| Kamal 2015(43)         | Measures attitude towards physician-industry interaction                                                                                                                                                                                  |
| Kannan 2015(44)        | Measures attitude towards physician-industry interaction                                                                                                                                                                                  |
| Khajuria 2013(45)      | No control group of interest ( study involved rating various pharmaceutical communication strategies by physicians using five point Likert scale ranging from “Not At All Important effective” (score =1) to “Very Important” (score =5)) |
| Kinoshita 2015(46)     | Focus on medical student/residents/trainees                                                                                                                                                                                               |
| Klemenc-Ketis 2013(47) | No exposure of interest                                                                                                                                                                                                                   |
| Knudsen 2014(48)       | Ecological study (study looked at the association between organizational characteristics and actual adoption and not at the level of physician)                                                                                           |
| Lee 2016(49)           | No outcome of interest                                                                                                                                                                                                                    |
| Lenzen 2016(50)        | Non-English study                                                                                                                                                                                                                         |
| Lenzer 2015(51)        | Not a primary study                                                                                                                                                                                                                       |
| Lurk 2004(52)          | No outcome of interest                                                                                                                                                                                                                    |
| Lussier 2015(53)       | Non-English study                                                                                                                                                                                                                         |
| Mackowiak 1985(54)     | Ecological study                                                                                                                                                                                                                          |
| Maeda 2015 (55)        | Not industry-related                                                                                                                                                                                                                      |
| Mansfield 2005(56)     | Not a primary study                                                                                                                                                                                                                       |
| Mansfield 2008(57)     | Not a primary study                                                                                                                                                                                                                       |
| McMahon 2015(58)       | Not a primary study                                                                                                                                                                                                                       |
| McGavock 1993(59)      | No exposure of interest                                                                                                                                                                                                                   |
| Miao-Sheng 2008(60)    | No exposure of interest (study focused on sales discount as a marketing strategy)                                                                                                                                                         |
| Narendran 2013(61)     | No control group of interest (Study involved rating the effectiveness of different marketing strategies (on a scale of 1-7) by physicians and sales personnel)                                                                            |



|                          |                                                                                                                 |
|--------------------------|-----------------------------------------------------------------------------------------------------------------|
| Newton-Syms<br>1992(62)  | Not industry-related<br>(industry-independent drug information interventions)                                   |
| O'Dowd<br>2015(63)       | Not a primary study                                                                                             |
| Peah, 1984(64)           | Measures attitude towards physician-industry interaction                                                        |
| Prosser<br>2003(65)      | Qualitative study                                                                                               |
| Prosser<br>2003(66)      | Qualitative study                                                                                               |
| Rahman<br>2015(67)       | Qualitative study                                                                                               |
| Ridley 2015(68)          | No exposure of interest                                                                                         |
| Riese 2015(69)           | Focuses on medical students/residents/trainees                                                                  |
| Sarpatwari<br>2015(70)   | No association of interest                                                                                      |
| Sharma<br>2016(71)       | Not a primary study<br>(presented only as abstract)                                                             |
| Skipper<br>2015(72)      | No association of interest                                                                                      |
| Spurling<br>2007(73)     | Intervention study                                                                                              |
| Spurling<br>2010(74)     | Not a primary study<br>(systematic review)                                                                      |
| Stark 2016 (75)          | Measures attitude towards physician-industry interaction                                                        |
| Steinman<br>2007(76)     | No control group of interest                                                                                    |
| Stelfox<br>1998(77)      | Focuses on medical students/residents/trainees<br>(results of interest not restricted to practicing physicians) |
| Stoddard<br>2003(78)     | No association of interest                                                                                      |
| Tahmasebi 2015<br>(79)   | Econometric study (no targeted interaction)                                                                     |
| Turner 1986(80)          | Not a primary study (narrative study)                                                                           |
| Tahmasebi<br>2015(81)    | No exposure of interest                                                                                         |
| Taylor 1991(82)          | No control group of interest                                                                                    |
| Tengilimoglu<br>2005(83) | No association of interest                                                                                      |
| Tobin 2008(84)           | Qualitative study                                                                                               |
| Wilson<br>1963(85)       | No control group of interest                                                                                    |

## References of excluded studies

1. Ahmadi Nasab Emran S. Assessing Information from Pharmaceutical Company Representatives. *AMA J Ethics*. 2015;17(8):729-33.
2. Al-Areefi MA, Hassali MA, Mohamed Ibrahim MI. The role of pharmaceutical marketing and other factors in prescribing decisions: the Yemeni experience. *Research in social & administrative pharmacy : RSAP*. 2013;9(6):981-8.
3. Alssageer MA, Kowalski SR. A survey of pharmaceutical company representative interactions with doctors in Libya. *The Libyan journal of medicine*. 2012;7.
4. Anadaleeb SS, Tallman RF. Relationships of physicians with pharmaceutical sales representatives and pharmaceutical companies: an exploratory study. *Health Mark Q*. 1996;13(4):79-89.
5. Anderson TS, Huskamp HA, Epstein AJ, Barry CL, Men A, Berndt ER, et al. Antipsychotic prescribing: do conflict of interest policies make a difference? *Med Care*. 2015;53(4):338-45.
6. Anonymous. No-gift policy in medical schools. Demonstrated impact on prescribing behaviour. *Prescrire Int*. 2015;24(159):111.
7. Babu MA, Heary RF, Nahed BV. Device innovation in neurosurgery: controversy, learning, and future directions. *Neurosurgery*. 2012;70(4):789-94; discussion 94-5.
8. Backer EL, Lebsack JA, Van Tonder RJ, Crabtree BF. The value of pharmaceutical representative visits and medication samples in community-based family practices. *J*. 2000;49(9):811-6.
9. Berings D, Blondeel L, Habraken H. The effect of industry-independent drug information on the prescribing of benzodiazepines in general practice. *Eur J Clin Pharmacol*. 1994;46(6):501-5.
10. Bogenmann L, Vidal P, Pereira B, Tauveron I. Characteristics of practitioners prescribing glucagon-like peptide-1 receptor agonists and dipeptidyl peptidase-4 inhibitors. [French]. *Medecine des Maladies Metaboliques*. 2015;9(3):311-5.
11. Boltri, J. M., Gordon, E. R., & Vogel, R. L. (2002). Effect of antihypertensive samples on physician prescribing patterns. *Family medicine*, 34(10), 729-731.
12. Burashnikova IS, Ziganshin AU, Ziganshina LE. Attitudes to pharmaceutical promotion techniques among healthcare professionals in the Republic of Tatarstan, Russia. *International Journal of Risk and Safety in Medicine*. 2008;20(1-2):57-71.
13. Caudill TS, Johnson MS, Rich EC, McKinney WP. Physicians, pharmaceutical sales representatives, and the cost of prescribing. *Arch Fam Med*. 1996;5(4):201-6.
14. Chew LD, O'Young TS, Hazlet TK, Bradley KA, Maynard C, Lessler DS. A physician survey of the effect of drug sample availability on physicians' behavior. *J Gen Intern Med*. 2000;15(7):478-83.
15. Chimonas S, Brennan TA, Rothman DJ. Physicians and drug representatives: exploring the dynamics of the relationship. *J Gen Intern Med*. 2007;22(2):184-90.
16. Chressanthis, G.A., Sfekas, A., Khedkar, P., Jain, N. and Poddar, P., 2014. Determinants of pharmaceutical sales representative access limits to physicians. *Journal of Medical Marketing*, 14(4), pp.220-243.
17. Christensen DB, Wertheimer AI. Sources of information and influence on new drug prescribing among physicians in an HMO. *Social science & medicine*. 1979;13A(3):313-22.
18. Darmon D, Belhassen M, Quien S, Langlois C, Staccini P, Letrilliart L. [Factors associated with drug prescription in general practice: a multicenter cross-sectional study]. *Sante Publique*. 2015;27(3):353-62.
19. De Angelis CD. The Importance of Physicians' Financial Disclosure for the Public's Health. *Milbank Quarterly*. 2015;93(4):679-82.
20. De Ferrari A, Gentile C, Davalos L, Huayanay L, Malaga G. Attitudes and relationship between physicians and the pharmaceutical industry in a public general hospital in Lima, Peru. *PloS one*. 2014;9(6):e100114.
21. De Las Cuevas C, Sanz EJ, De La Fuente JA. Variations in antidepressant prescribing practice:

clinical need or market influences? *Pharmacoepidemiol Drug Saf.* 2002;11(6):515-22.

22. Donohue JM, Berndt ER, Rosenthal M, Epstein AM, Frank RG. Effects of pharmaceutical promotion on adherence to the treatment guidelines for depression. *Med Care.* 2004;42(12):1176-85.

23. Doval HC, Tajer CD, Borracci RA, Nunez C, Samarelli M, Tamini S. Survey on Ethical Conduct Thresholds in Cardiologal Medical Practice in Argentina. *Developing World Bioeth.* 2015;15(2):68-75.
24. Fleischman W, Agrawal S, King M, Venkatesh AK, Krumholz HM, McKee D, et al. Association between payments from manufacturers of pharmaceuticals to physicians and regional prescribing: cross sectional ecological study. *Bmj.* 2016;354:i4189.
25. Ferguson RP, Rhim E, Belizaire W, Egede L, Carter K, Lansdale T. Encounters with pharmaceutical sales representatives among practicing internists. *Am J Med.* 1999;107(2):149-52.
26. Freeman JK, Barnes JH, Summers KH, Szeinbach SL. Modeling physicians' prescribing decisions for patients with panic disorder. *J Health Care Mark.* 1993;13(1):34-9.
27. Freemantle N, Johnson R, Dennis J, et al. Sleeping with the enemy? A randomized controlled trial of a collaborative health authority/ industry intervention to influence prescribing practice. *Br J Clin Pharmacol* 2000;49:174–9
28. Fretheim A, Oxman AD. International variation in prescribing antihypertensive drugs: its extent and possible explanations. *BMC Health Serv Res.* 2005;5(1):21.
29. Gönül F, Carter, F., Petrova, E., Srinivasan, K. . Promotion of Prescription Drugs and Its Impact on Physicians' Choice Behavior. *Journal of Marketing.* 2001;65(3):79-90.
30. Gonul FF, Carter FJ. Impact of e-detailing on the number of new prescriptions. *Health Care Manag Sci.* 2010;13(2):101-11.
31. Gunnarsdottir AI, Kinnear M. Factors that influence prescribers in their selection and use of COX-2 selective inhibitors as opposed to non-selective NSAIDs. *Pharm World Sci.* 2005;27(4):316-20.
32. Halperin EC, Hutchison P, Barrier RC, Jr. A population-based study of the prevalence and influence of gifts to radiation oncologists from pharmaceutical companies and medical equipment manufacturers. *Int J Radiat Oncol Biol Phys.* 2004;59(5):1477-83.
33. Hansen RA, Chen SY, Gaynes BN, Maciejewski ML. Relationship of pharmaceutical promotion to antidepressant switching and adherence: a retrospective cohort study. *Psychiatr Serv.* 2010;61(12):1232-8.
34. Hemminki E, Karttunen T, Hovi SL, Karro H. The drug industry and medical practice--the case of menopausal hormone therapy in Estonia. *Social science & medicine.* 2004;58(1):89-97.
35. Henry D, Lexchin J. The pharmaceutical industry as a medicines provider. *Lancet.* 2002;360(9345):1590-5.
36. Galan Herrera S, Delgado Marroquin MT, Altisent Trota R. [Analysis of the relationship between primary care doctors and the pharmaceutical industry]. *Atencion primaria / Sociedad Espanola de Medicina de Familia y Comunitaria.* 2004;34(5):231-7.
37. Hartung, D. M., Evans, D., Haxby, D. G., Kraemer, D. F., Andeen, G., & Fagnan, L. J. (2010). Effect of drug sample removal on prescribing in a family practice clinic. *The Annals of Family Medicine*, 8(5), 402-409.
38. Hossain MK, S., Tanmy, T., Yousuf, A. Assessment of influencing factors on prescription practices of physicians in bangladesh. *International Research Journal of Pharmacy.* 2013;4(8):112-6.
39. Ichikawa I, Clayton EW. Doping Doctors: The Influence of the Marketing Departments of Pharmaceutical Companies on Physician and Researcher Behavior in Japan. *Account Res.* 2016;23(4):245-53.
40. Iizuka T. Experts' agency problems: evidence from the prescription drug market in Japan. *Rand J Econ.* 2007;38(3):844-62.
41. Indhumathi D, Krishnaraj. The inference of the characteristics of phamaceutical drug advertising upon the level of physician's acceptance. *International Journal of Pharmaceutical Sciences Review and Research.* 2015;32(2):220-6.
42. Joyce GF, Carrera MP, Goldman DP, Sood N. Physician prescribing behavior and its impact on patient-level outcomes. *Am J Manag Care.* 2011;17(12):e462-71.



43. Kamal S, Holmberg C, Russell J, Bochenek T, Tobiasz-Adamczyk B, Fischer C, et al. Perceptions and Attitudes of Egyptian Health Professionals and Policy-Makers towards Pharmaceutical Sales Representatives and Other Promotional Activities. *PLoS ONE*. 2015;10(10):e0140457.
44. Kannan S, Gowri S, Tyagi V, Kohli S, Jain R, Kapil P, et al. Direct-to-physician and direct-to-consumer advertising: Time to have stringent regulations. *Int*. 2015;27(2):77
45. Khajuria A, Khajuria, V. Impact of Pharmaceutical Marketing Communication Strategies on Prescription Practices of Physicians. *RJPBCS*. 2013;4(3):882-9.
46. Kinoshita K, Tsugawa Y, Barnett PB, Tokuda Y. Challenging cases of professionalism in Japan: improvement in understanding of professional behaviors among Japanese residents between 2005 and 2013. *BMC Med Educ*. 2015;15:42.
47. Klemenc-Ketis Z, Kersnik J. The assessment of pharmaceutical sales representatives by family physicians--does it affect the prescribing index? *Family practice*. 2013;30(3):320-4.
48. Knudsen HK, Roman PM. The transition to medication adoption in publicly funded substance use disorder treatment programs: organizational structure, culture, and resources. *Journal of studies on alcohol and drugs*. 2014;75(3):476-85.
49. Lee D, Begley CE. Physician report of industry gifts and quality of care. *Health Care Manage Rev*. 2016;41(3):275-83.
50. Lenzen LM, Weidringer JW, Ollenschlager G. [Conflict of interest in continuing medical education - Studies on certified CME courses]. *Z*. 2016;110-111:60-8.
51. Lenzer J. California doctors under investigation for prescribing practices. *Bmj*. 2015;350:h74.
52. Lurk JT, DeJong DJ, Woods TM, Knell ME, Carroll CA. Effects of changes in patient cost sharing and drug sample policies on prescription drug costs and utilization in a safety-net-provider setting. *American journal of health-system pharmacy : AJHP : official journal of the American Society of Health-System Pharmacists*. 2004;61(3):267-72.
53. Lussier MT, Vanier MC, Authier M, Diallo FB, Gagnon J. Drug sample management in University of Montreal family medicine teaching units. *Canadian Family Physician*. 2015;61(9):e417-e24.
54. Mackowiak JI, Gagnon JP. Effects of promotion on pharmaceutical demand. *Social science & medicine*. 1985;20(11):1191-7.
55. Maeda K, Katashima R, Ishizawa K, Yanagawa H. Japanese Physicians' Views on Drug Post-Marketing Surveillance. *J Clin Med Res*. 2015;7(12):956-60.
56. Mansfield PR. Banning all drug promotion is the best option pending major reforms. *J Bioeth Inq*. 2005;2(2):75-81.
57. Mansfield PR. Do advertisements in clinical software influence prescribing? *Med J Aust*. 2008;188(1):13-4.
58. McMahan GT. Advancing Continuing Medical Education. *Jama*. 2015;314(6):561-2.
59. McGavock H, Webb CH, Johnston GD, Milligan E. Market penetration of new drugs in one United Kingdom region: implications for general practitioners and administrators. *Bmj*. 1993;307(6912):1118-20.
60. Miao-Sheng C, Yu-Ti S. Pricing of prescription drugs and its impact on physicians' choice behavior. *Health Care Manag Sci*. 2008;11(3):288-95.
61. Narendran R, Narendranathan M. Influence of pharmaceutical marketing on prescription practices of physicians. *Journal of the Indian Medical Association*. 2013;111(1):47-50.
62. Newton-Syms FAO, Dawson PH, Cooke J, Feely M, Booth TG, Jerwood D, et al. The influence of an academic representative on prescribing by general practitioners. *British Journal of Clinical Pharmacology*. 1992;33(1):69-73.
63. O'Dowd A. Doctors face compulsory system to declare gifts and hospitality from drug companies. *Bmj*. 2015;351:h4617.
64. Peay MY, Peay ER. Differences among practitioners in patterns of preference for information sources in the adoption of new drugs. *Social science & medicine*. 1984;18(12):1019-25.

65. Prosser H, Walley T. New drug uptake: qualitative comparison of high and low prescribing GPs' attitudes and approach. *Family practice*. 2003;20(5):583-91.
66. Prosser H, Walley T. Understanding why GPs see pharmaceutical representatives: A qualitative interview study. *British Journal of General Practice*. 2003;53(489):305-11.
67. Rahman MH, Agarwal S, Tuddenham S, Peto H, Iqbal M, Bhuiya A, et al. What do they do? Interactions between village doctors and medical representatives in Chakaria, Bangladesh. *Int Health*. 2015;7(4):266-71.
68. Ridley DB. Payments, promotion, and the purple pill. *Health economics*. 2015;24(1):86-103.
69. Riese F, Guloksuz S, Roventa C, Fair JD, Haravuori H, Rolko T, et al. Pharmaceutical industry interactions of psychiatric trainees from 20 European countries. *Eur Psychiatry*. 2015;30(2):284-90.
70. Sarpatwari A, Choudhry NK, Avorn J, Kesselheim AS. Paying Physicians to Prescribe Generic Drugs and Follow-On Biologics in the United States. *PLoS Medicine*. 2015;12 (3) (no pagination)(e1001802).
71. Sharma M, Johnson ML, Vadhariya A, Marcum ZA, Holmes HM. The association of prescriber characteristics with prescriptions for proton pump inhibitors in the medicare part D beneficiaries. *Value in Health*. 2016;19 (3):A317.
72. Skipper N, Vejlin R. Determinants of generic vs. brand drug choice: evidence from population-wide Danish data. *Soc Sci Med*. 2015;130:204-15.
73. Spurling G, Mansfield P. General practitioners and pharmaceutical sales representatives: quality improvement research. *Qual Saf Health Care*. 2007;16(4):266-70.
74. Spurling GK, Mansfield PR, Montgomery BD, Lexchin J, Doust J, Othman N, et al. Information from pharmaceutical companies and the quality, quantity, and cost of physicians' prescribing: a systematic review. *PLoS Med*. 2010;7(10):e1000352.
75. Stark TJ, Brownell AK, Brager NP, Berg A, Balderston R, Lockyer JM. Exploring Perceptions of Early-Career Psychiatrists About Their Relationships With the Pharmaceutical Industry. *Acad Psychiatry*. 2016;40(2):249-54.
76. Steinman MA, Harper GM, Chren MM, Landefeld CS, Bero LA. Characteristics and impact of drug detailing for gabapentin. *PLoS Med*. 2007;4(4):e134.
77. Stelfox HT, Chua G, O'Rourke K, Detsky AS. Conflict of interest in the debate over calcium-channel antagonists. *N Engl J Med*. 1998;338(2):101-6.
78. Stoddard JJ, Reed M, Hadley J. Financial incentives and physicians' perceptions of conflict of interest and ability to arrange medically necessary services. *J Ambulatory Care Manage*. 2003;26(1):39-50.
79. Tahmasebi N, Kebriaeezadeh A. Evaluation of factors affecting prescribing behaviors, in iran pharmaceutical market by econometric methods. *Iran*. 2015;14(2):651-6.
80. Turner P. Profitability and improved patient care - The physician's viewpoint. *British Journal of Clinical Pharmacology*. 1986;22(SUPPL. 1):41S-3S.
81. Tahmasebi N, Kebriaeezadeh A. Evaluation of factors affecting prescribing behaviors, in iran pharmaceutical market by econometric methods. *Iranian journal of pharmaceutical research : IJPR*. 2015;14(2):651-6.
82. Taylor RJ, Bond CM. Change in the established prescribing habits of general practitioners: an analysis of initial prescriptions in general practice. *British Journal of General Practice*. 1991;41(347):244-8.
83. Tengilimoglu D, Kisa A, Ekiyor A. The pharmaceutical sales rep/physician relationship in Turkey: ethical issues in an international context. *Health Mark Q*. 2005;22(1):21-39.
84. Tobin L, de Almedia Neto AC, Wutzke S, Patterson C, Mackson J, Weekes L, et al. Influences on the prescribing of new drugs. *Aust Fam Physician*. 2008;37(1-2):78-80, 3.
85. Wilson CWAB, J.A.; Mapes, R.E.A.; Korte, S. pattern of prescribing in general practice *British*

Medical Journal 1963:604-7.
